# Supplementary material for: Characteristics of Soil Organic Carbon Fractions and Stability along a Chronosequence of Cryptomeria japonica var. sinensis Plantation in the Rainy Area of Western China
Source: MDPI journal article supplement (doi:10.3390/f13101663), 2022-10-10
Supplement: s1 [file s1]

Supplementary material for

# Characteristics of soil organic carbon fractions and stability along a chronosequence of *Cryptomeria japonica* var. *sinensis* plantation in the rainy area of western China

Xin Han<sup>1,†</sup>, Xuan Liu<sup>1,†</sup>, Zhiwei Li<sup>1</sup>, Jiao Li<sup>1</sup>, Yaling Yuan<sup>1</sup>, Han Li<sup>1</sup>, Li Zhang<sup>1</sup>, Sining Liu<sup>1</sup>, Lixia Wang<sup>1</sup>, Chengming You<sup>1</sup>, Bo Tan<sup>1</sup>, Zhenfeng Xu<sup>1,\*</sup>

<sup>1</sup> Forestry Ecological Engineering in the Upper Reaches of the Yangtze River Key Laboratory of Sichuan Province & National Forestry and Grassland Administration Key Laboratory of Forest Resources Conservation and Ecological Safety on the Upper Reaches of the Yangtze River & Rainy Area of West China Plantation Ecosystem Permanent Scientific Research Base, Institute of Ecology & Forestry, Sichuan Agricultural University, Chengdu 611130, China;

\* Correspondence: Zhenfeng Xu, xuzf@sicau.edu.cn

† These authors contributed equally to this work.

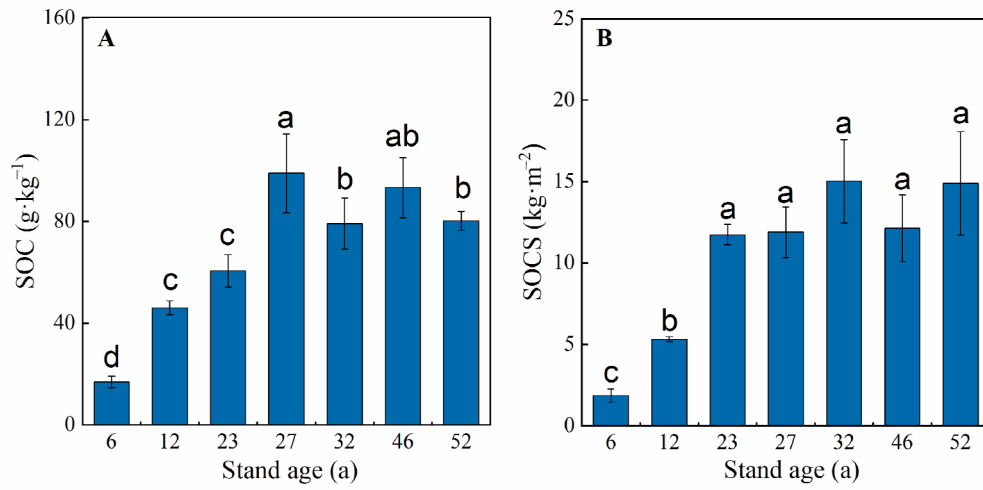

**Figure S1.** Soil organic carbon (SOC) concentrations and soil organic carbon storage (SOCS) in *C. japonica* plantation at different stand ages in the rainy area of western China. Different lowercase letters indicate significant differences between different stand ages at 0.05 level.

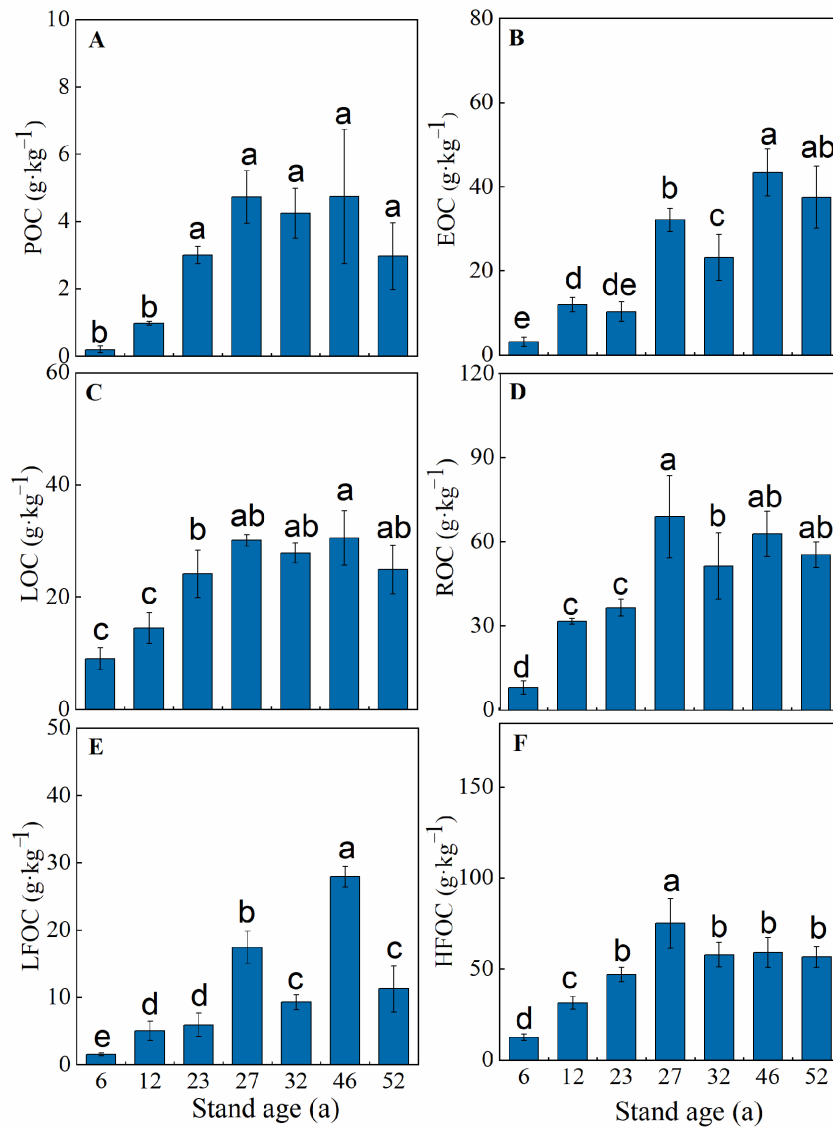

**Figure S2.** Soil organic carbon fractions of soil particulate organic carbon (POC), easily oxidizable carbon (EOC), labile organic carbon (LOC), recalcitrant organic carbon (ROC), light fraction organic carbon (LFOC) and heavy fraction organic carbon (HFOC) in *C. japonica* plantation at different stand ages in the rainy area of western China. Different lowercase letters indicate significant differences between different stand ages at 0.05 level.
